# Supplementary material for: Outcomes of the EXIME prostatic stent: A prospective feasibility study in black South African patients
Source: Research Square preprint supplement (doi:10.21203/rs.3.rs-8651019/v1), 2026-02-11
Supplement: Supplementary file 1 [file e49f77079783160e90d4a669.docx]

Table 1: Patient Demographics, Baseline Characteristics and Functional Outcomes (n=50)

| **Parameter** | **Value** | **p-value** |
| --- | --- | --- |
| **I. Baseline Demographics & Clinical History** |  |  |
| Age (years), Mean [95% CI] | 65.2 [63.5, 66.8] | - |
| Prostate Volume (ml), Mean [95% CI] | 60.4 [53.9, 66.8] | - |
| Duration of Foley Indwelling (months), Mean [95% CI] | 5.71 [3.8, 7.5] | - |
| Urine Retention Volume (Prior to Foley), Mean [95% CI] | 345.0 [299.9, 390.0] | - |
| Index Presentation, n (%) |  |  |
| Chronic Urinary Retention | 45 (90%) | - |
| Transurethral Foley Catheter | 42 (84%) | - |
| Suprapubic Foley Catheter | 3 (6%) | - |
| Acute Urinary Retention (Transurethral Foley) | 5 (10%) | - |
| Anatomy, n (%) |  |  |
| Median Lobe Enlargement (IPP present) | 20 (40%) | - |
| Hydroureteronephrosis (at index presentation) | 7 (14%) | - |
| **II. Post-Insertion Voiding Parameters** |  |  |
| Spontaneous Voiding Rate, n (%) | 50 (100%) | - |
| Qmax (ml/s), Mean [95% CI] | 18.01 [16.3, 19.6] | - |
| Voided Volume (ml), Mean [95% CI] | 220.6 [198.5, 242.8] | - |
| Post-Void Residual (ml), Mean [95% CI] | 22.6 [18.2, 27.0] | - |
| **III. Comparative Functional Outcomes** |  |  |
| Sexual Activity, n (%) |  |  |
| Pre-Foley Catheter Insertion | 26 (52%) | - |
| With Foley Catheter In Situ | 0 (0%) | - |
| With EXIME Stent In Situ | 28 (56%) | - |
| Regain of sexual function (if active pre-Foley) | 23/26 (88%) | < 0.001 |
| Urinalysis (Dipstick Positivity), n (%) |  |  |
| Combined Leukocyte Esterase (LE) or Nitrite Positive |  |  |
| At Foley Removal (Baseline) | 30 (60%) | - |
| At Stent Retrieval (1 Month) | 9 (18%) | < 0.001 |
| Nitrite Reaction Positive Only |  |  |
| At Foley Removal (Baseline) | 13 (26%) | - |
| At Stent Retrieval (1 Month) | 0 (0%) | < 0.001 |

***Abbreviations:****CI = Confidence Interval; IPP = Intravesical Prostatic Protrusion; Qmax = Maximum flow rate*
